# Supplementary material for: Ruthenium Complex HB324 Induces Apoptosis via Mitochondrial Pathway with an Upregulation of Harakiri and Overcomes Cisplatin Resistance in Neuroblastoma Cells In Vitro
Source: MDPI journal article supplement (doi:10.3390/ijms24020952), 2023-01-04
Supplement: s1 [file s1]

### Supporting information (SI)

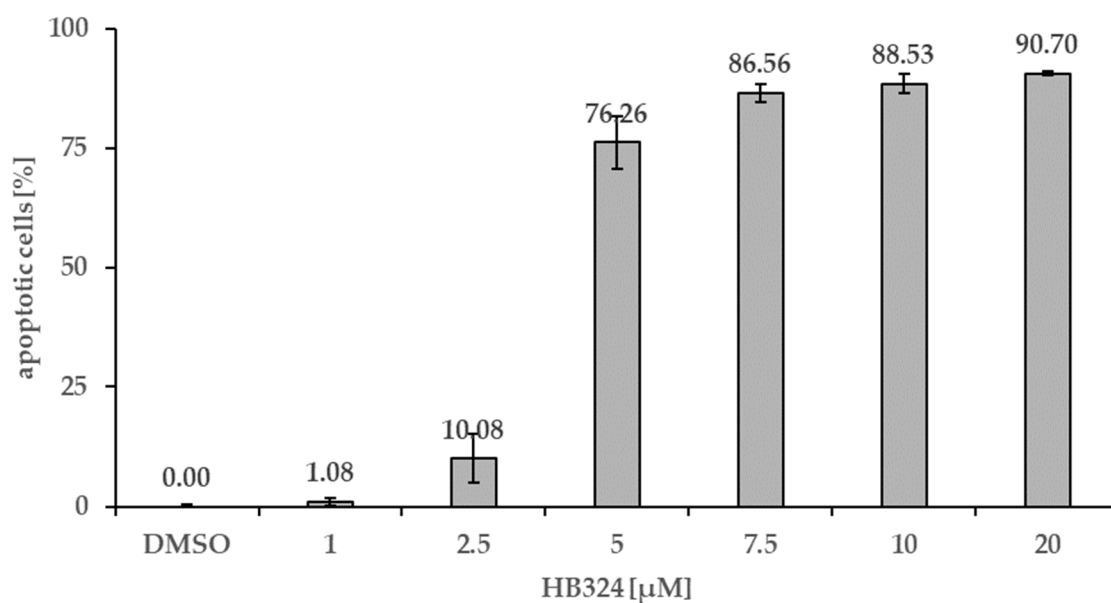

**Figure S1** Nalm-6 cells were incubated for 72 h with increasing concentrations of HB324. Solvent treated cells (0.5 % DMSO) served as control. Nuclear DNA fragmentation was quantified by flow cytometric determination of hypodiploid DNA. Data are given in % hypoploidy (subG1), which reflects the number of apoptotic cells as mean values  $\pm$  SD (n=3).

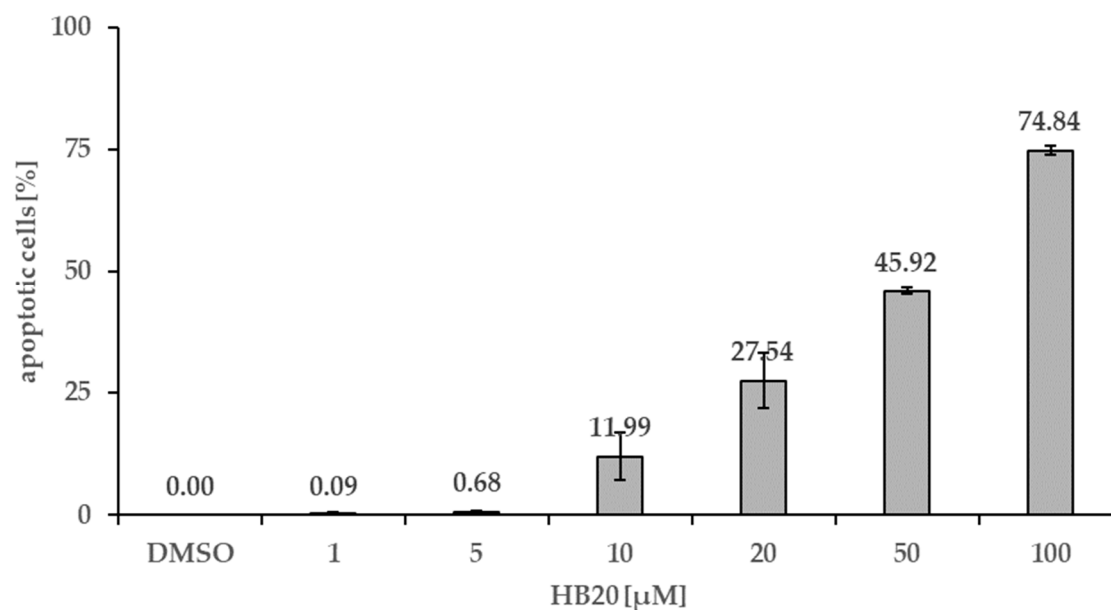

**Figure S2** Nalm-6 cells were incubated for 72 h with increasing concentrations of HB20. Solvent treated cells (0.5 % DMSO) served as control. Nuclear DNA fragmentation was quantified by flow cytometric determination of hypodiploid DNA. Data are given in % hypoploidy (subG1), which reflects the number of apoptotic cells as mean values  $\pm$  SD (n=3).

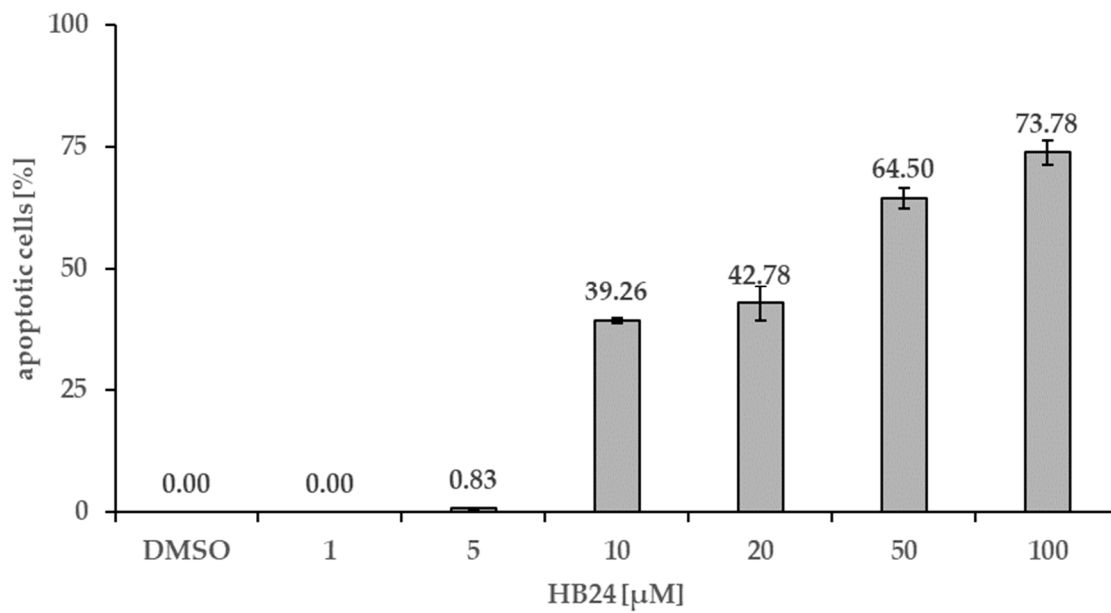

**Figure S3** Nalm-6 cells were incubated for 72 h with increasing concentrations of HB24. Solvent treated cells (0.5 % DMSO) served as control. Nuclear DNA fragmentation was quantified by flow cytometric determination of hypodiploid DNA. Data are given in % hypoploidy (subG1), which reflects the number of apoptotic cells as mean values  $\pm$  SD (n=3).

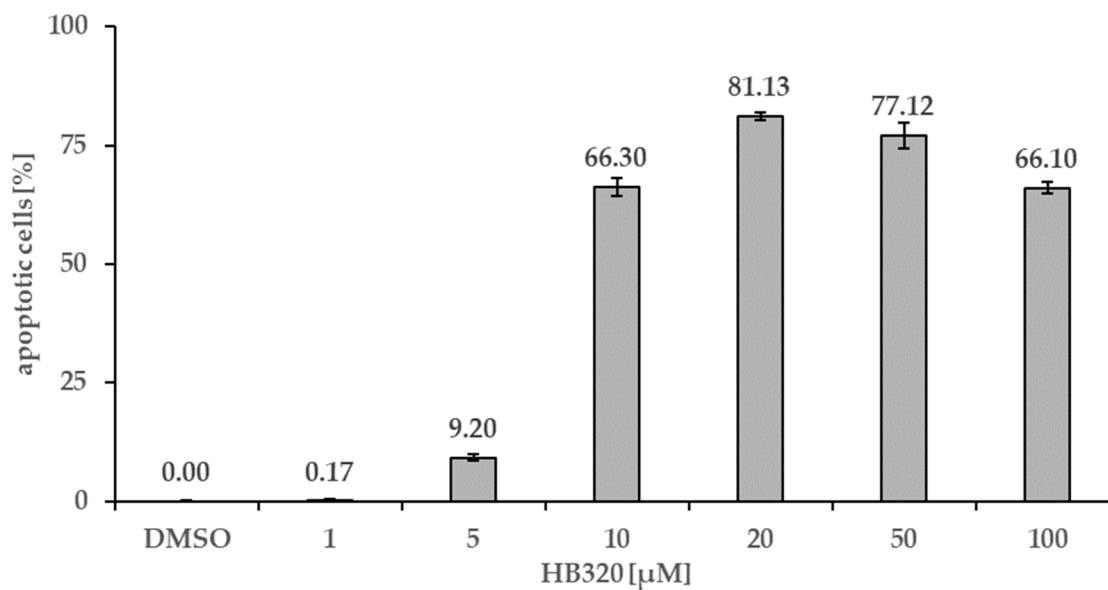

**Figure S4** Nalm-6 cells were incubated for 72 h with increasing concentrations of HB320. Solvent treated cells (0.5 % DMSO) served as control. Nuclear DNA fragmentation was quantified by flow cytometric determination of hypodiploid DNA. Data are given in % hypoploidy (subG1), which reflects the number of apoptotic cells as mean values  $\pm$  SD (n=3).

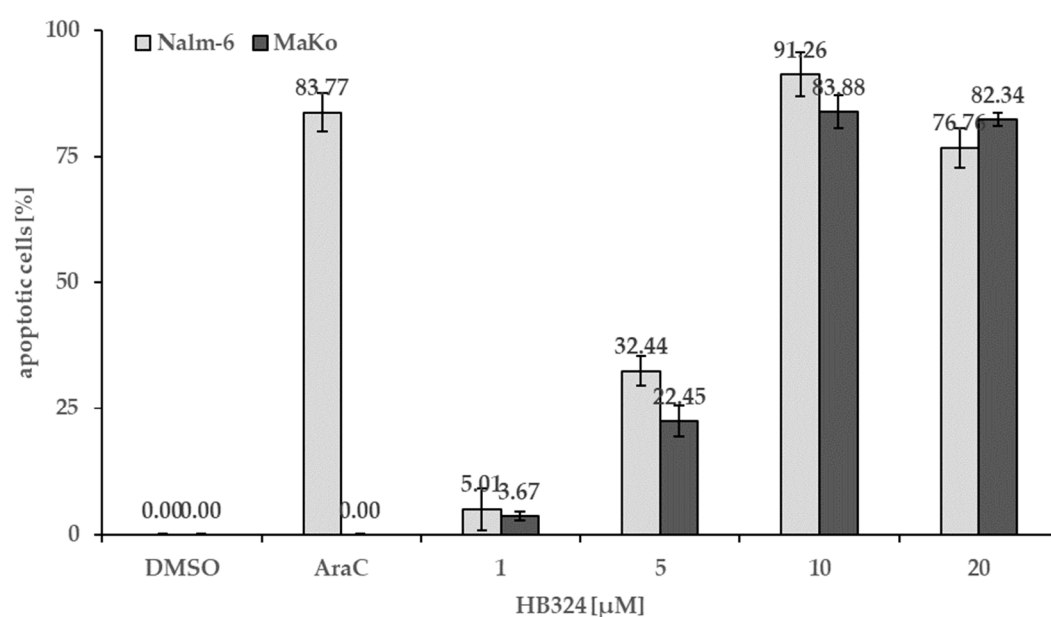

**Figure S5** Apoptosis induction induced by HB324 in Nalm-6 and cytarabine-resistant Nalm-6 cells (MaKo). After 72 h of incubation with different concentrations of the agent DNA fragmentation was measured via FACS scan analysis. Solvent treated cells (0.5 % DMSO) served as control. 1.4 µM cytarabine (AraC) served as positive control. Values of DNA fragmentation are given as mean percentages of cells with hypodiploid DNA  $\pm$  S.D. (n=3).

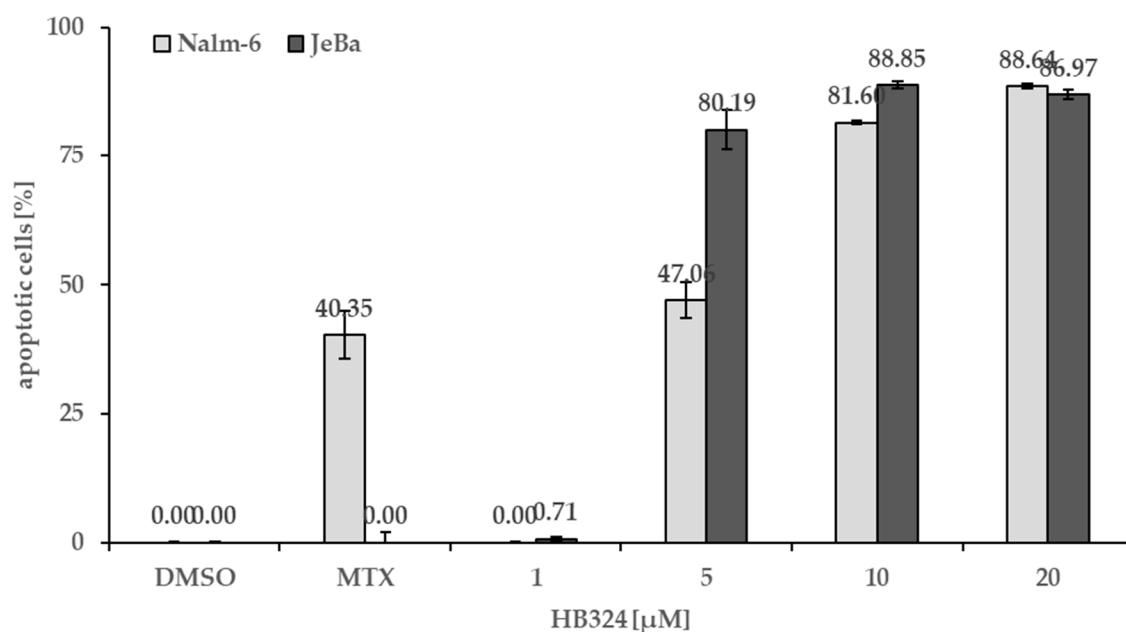

**Figure S6** Apoptosis induction induced by HB324 in Nalm-6 and methotrexate-resistant Nalm-6 cells (JeBa). After 72 h of incubation with different concentrations of the agent DNA fragmentation was measured via FACS scan analysis. Solvent treated cells (0.5 % DMSO) served as control. 50 nM methotrexate (MTX) served as positive control. Values of DNA fragmentation are given as mean percentages of cells with hypodiploid DNA  $\pm$  S.D. (n=3).

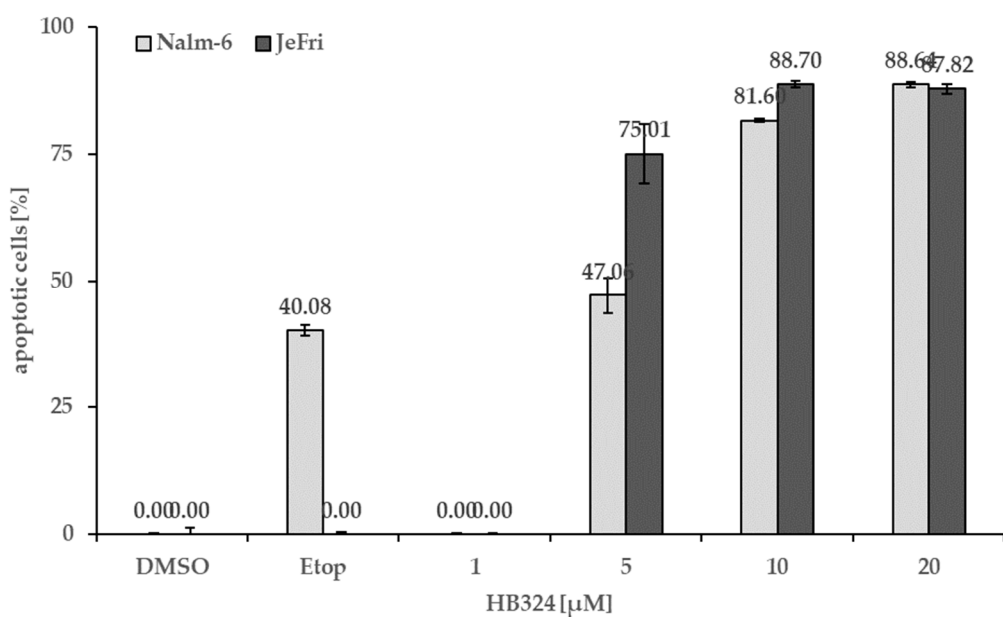

**Figure S7** Apoptosis induction induced by HB324 in Nalm-6 and etoposide-resistant Nalm-6 cells (JeFri). After 72 h of incubation with different concentrations of the agent DNA fragmentation was measured via FACS scan analysis. Solvent treated cells (0.5 % DMSO) served as control. 0.36 μM etoposide (Etop) served as positive control. Values of DNA fragmentation are given as mean percentages of cells with hypodiploid DNA ± S.D. (n=3).

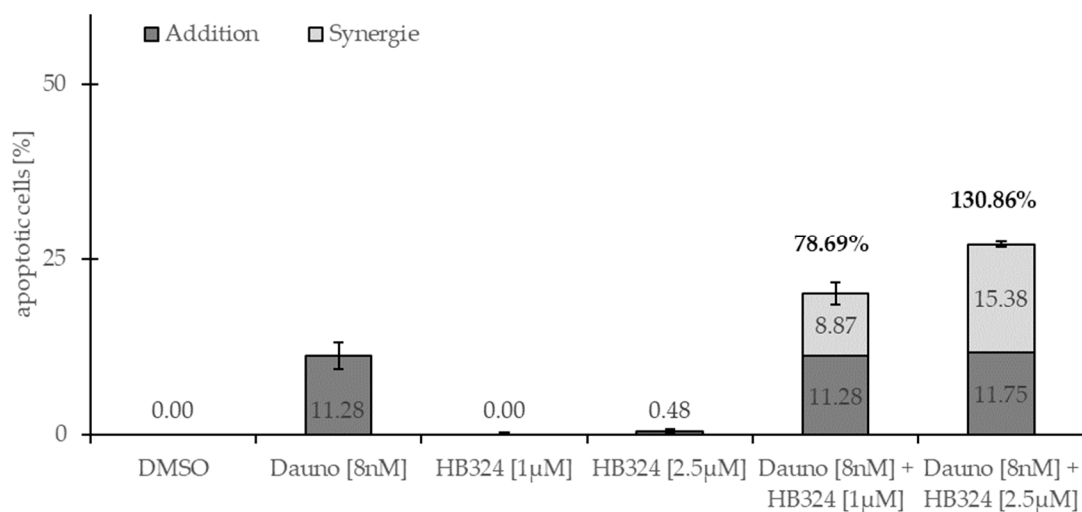

**Figure S8** Nalm-6 cells were treated with 1 μM and 2.5 μM of HB324 and 8 nM of daunorubicin (Dauno) alone and in combination. Solvent treated cells (0.5 % DMSO) served as control. After 72 h of incubation, DNA fragmentation was measured by flow cytometric analysis. Values are given in percentage of apoptotic cells and as mean values ± SD (n=3). The synergistic effect is shown as the percentages of the additional number of apoptotic cells relative to the sum of the individual number of apoptotic cells.
